# Supplementary material
Source: PubMed Central journal article supplement (PMC4861401)
Supplement: NIHMS782696-supplement-supplement_1.pdf [file NIHMS782696-supplement-supplement_1.pdf]

## Appendix B: Supplementary results

Table B1. Characteristics of non-psychiatric inpatients ages 22 to 64

|                               | MEPS<br>(N=8852) |                               |                | NIS<br>(N=20026181) |                               |                | z    | p      | MEPS%/NIS% |
|-------------------------------|------------------|-------------------------------|----------------|---------------------|-------------------------------|----------------|------|--------|------------|
|                               | n                | total<br>(1000s) <sup>a</sup> | % <sup>a</sup> | n                   | total<br>(1000s) <sup>a</sup> | % <sup>a</sup> |      |        |            |
| Age group                     |                  |                               |                |                     |                               |                |      |        |            |
| 22-44                         | 4,429            | 6,918                         | 48.2           | 9,637,631           | 8,011                         | 48.1           | -0.1 | 0.893  | 1.00       |
| 45-64                         | 4,423            | 7,427                         | 51.8           | 10,388,550          | 8,635                         | 51.9           |      |        | 1.00       |
| Gender                        |                  |                               |                |                     |                               |                |      |        |            |
| Male                          | 2,703            | 4,894                         | 34.1           | 7366338             | 6,123                         | 36.8           | -2.9 | 0.004  | 0.93       |
| Female                        | 6,149            | 9,451                         | 65.9           | 12,659,843          | 10,523                        | 63.2           |      |        | 1.04       |
| Insurance Source <sup>b</sup> |                  |                               |                |                     |                               |                |      |        |            |
| Medicare                      | 1,095            | 1,572                         | 11.0           | 2727513             | 2,267                         | 13.6           | -2.6 | 0.010  | 0.80       |
| Medicaid                      | 1,965            | 2,325                         | 16.2           | 4,227,106           | 3,514                         | 21.1           | -5.3 | <0.001 | 0.77       |
| Other public                  | 192              | 300                           | 2.1            | 1,183,139           | 983                           | 5.9            | -2.2 | 0.025  | 0.35       |
| Private insurance             | 4,299            | 8,425                         | 58.7           | 10,249,304          | 8,519                         | 51.2           | 9.9  | <0.001 | 1.15       |
| Self-Pay/Uninsured            | 1,281            | 1,699                         | 11.8           | 1,639,119           | 1,362                         | 8.2            | 4.8  | <0.001 | 1.45       |
| Region                        |                  |                               |                |                     |                               |                |      |        |            |
| Northeast                     | 1,315            | 2,448                         | 17.1           | 3,656,012           | 3,039                         | 18.3           | -1.1 | 0.264  | 0.93       |
| Midwest                       | 1,966            | 3,497                         | 24.4           | 4,337,979           | 3,606                         | 21.7           | 2.9  | 0.003  | 1.13       |
| South                         | 3,703            | 5,671                         | 39.5           | 7,995,418           | 6,646                         | 39.9           | -0.5 | 0.626  | 0.99       |
| West                          | 1,868            | 2,729                         | 19.0           | 4,036,772           | 3,355                         | 20.2           | -1.2 | 0.222  | 0.94       |

<sup>a</sup> Totals and percentages are weighted.

**Table B.2. Race-ethnicity among MEPS and NIS inpatients ages 22-64, by admission category**

|                            | MEPS<br>(N=8852) |                  |      | NIS<br>(N=20026181) |                  |      |
|----------------------------|------------------|------------------|------|---------------------|------------------|------|
|                            | n                | total<br>(1000s) | %    | n                   | total<br>(1000s) | %    |
| All inpatients             |                  |                  |      |                     |                  |      |
| White non-Hispanic         | 4,596            | 10,176           | 67.8 | 10,883,706          | 9,044            | 49.6 |
| Non-white                  | 4,692            | 4,833            | 32.2 | 5,923,793           | 5,342            | 29.3 |
| Unknown/not-reported       |                  |                  |      | 4,200,212           | 3,847            | 21.1 |
| Psychiatric inpatients     |                  |                  |      |                     |                  |      |
| White non-Hispanic         | 196              | 394              | 72.3 | 979,429             | 817              | 51.5 |
| Non-white                  | 153              | 151              | 27.7 | 504,119             | 420              | 26.5 |
| Unknown/not-reported       |                  |                  |      | 419,476             | 350              | 22.0 |
| Non-psychiatric inpatients |                  |                  |      |                     |                  |      |
| White non-Hispanic         | 4,462            | 9,712            | 67.7 | 9,902,176           | 8,223            | 49.4 |
| Non-white                  | 4,390            | 4,633            | 32.3 | 5,923,793           | 4,927            | 29.6 |
| Unknown/not-reported       |                  |                  |      | 4,200,212           | 3,496            | 21.0 |
